# Supplementary material for: Calculation of Five Thermodynamic Molecular Descriptors by Means of a General Computer Algorithm Based on the Group-Additivity Method: Standard Enthalpies of Vaporization, Sublimation and Solvation, and Entropy of Fusion of ordinary Organic Molecules and Total Phase-Change Entropy of Liquid Crystals
Source: Preprints.org preprint supplement (doi:10.20944/preprints201705.0169.v1), 2017-05-23
Supplement: Supplementary file 1 [file Compounds List of Entropy-of-Fusion Outliers.xls]

## Sheet: Tabelle1
Outliers in DS(fus) (J/mol/K)
Molecule name	dS(fus) exp	dS(fus) calc	Difference
2,3,6,7,10,11-Hexaoctanoyloxytriphenylene	66.76	386.3	-319.54
2,4-Bis(N,N-didodecylamino)-6-chloro-s-triazine	111.4	421.2	-309.8
2,7-Didodecyloxy-9-(3,5-didodecyloxyphenyl)carbazole	185.7	449.6	-263.9
Perfluoroeicosane	243.37	35.5	207.87
Tris(N,N-didodecylamino)-s-triazine	372.12	577.8	-205.68
Perfluorotetracosane	235.9	35	200.9
Tris(N,N-didecylamino)-s-triazine	278.88	475.5	-196.62
2,3,6,7,10,11-Hexakis(1-decynyl)triphenylene	200.54	382	-181.46
Isonicotinic acid	227.66	50.4	177.26
4-Hexadecylphenyl-(6-(4-hexadecylphenyl)aminomethylene-9-methyl-9H-carbazol-3-ylmethylene)-amine	128.6	299.2	-170.6
Cyclooctatetracontane	389.76	224.1	165.66
Perfluorohexadecane	185.35	35.9	149.45
4-Dodecylphenyl-(6-(4-dodecylphenyl)aminomethylene-9-methyl-9H-carbazol-3-ylmethylene)-amine	83.7	231	-147.3
2-(3,5-Bis(4-dodecyloxyphenyl)-1H-pyrazol-1-yl)pyridine	137.42	276	-138.58
Tris(N,N-dioctylamino)-s-triazine	237.45	373.1	-135.65
2,7-Dihexyloxy-9-(3,5-dihexyloxyphenyl)carbazole	117.1	244.9	-127.8
Lorazepam	207.3	79.8	127.5
Dotetracontane	494.9	376.1	118.8
Tetrapentacontane	594.8	478.5	116.3
Perfluorododecane	150.04	36.3	113.74
Cilostazol	10.93	123.4	-112.47
1,1'-Biadamantane	130.8	27.1	103.7
Oxazepam	179.9	76.8	103.1
Tristearin	587.97	487.6	100.37
Tetracosamethylcyclododecasiloxane	65.97	163.6	-97.63
4-Propanoyl-4'-nonanoyloxyazobenzene	8.22	104.6	-96.38
17-Phenyl testosterone	158.2	64.1	94.1
Tetradecyl ether	357.92	264.2	93.72
17-Oxatritriacontane	391.86	298.4	93.46
Hexatetracontane	503.6	410.3	93.3
Tripalmitin	529.27	436.4	92.87
2,2,2-Trinitroethyl 4,4-dinitropentanoate	171.8	83.9	87.9
Dibenzo-30-crown-10	229.2	142	87.2
Benzene hexa-n-octanoate	293.82	380.7	-86.88
4-Hexyloxyphenyl-(6-(4-hexyloxyphenyl)aminomethylene-9-methyl-9H-carbazol-3-ylmethylene)-amine	55.31	141.8	-86.49
Nordiazepam	156.9	71.2	85.7
4-Octylphenyl-(6-(4-Octylphenyl)aminomethylene-9-methyl-9H-carbazol-3-ylmethylene)-amine	77.85	162.8	-84.95
1-Aceto-3-stearin	130.31	210.4	-80.09
3,3,4,4,6,6,7,7,9,9,10,10-Dodecafluoro-2,5,8,11-tetraoxododecane	96.9	16.9	80
Pentacosofluorodotriacontane	117.6	197.1	-79.5
Tristearin	565.9	487.6	78.3
3-(Hexyloxy)-1,2-propanediol	37.38	113.3	-75.92
Trimyristin	460.92	385.2	75.72
5-(1,1-Dimethylheptyl)-2-(5-hydroxy-2-(3-hydroxypropyl)-cyclohexyl)phenol	51.5	127	-75.5
4-Pentanoyl-4'-undecanoyloxyazobenzene	63.66	138.7	-75.04
20-Nonatriacontanone	418.5	343.9	74.6
13-Oxapentacosane	304.62	230.1	74.52
8-t-Butyltheophylline	119.81	47.3	72.51
7-Heptadecanol	91.6	163.2	-71.6
3beta-Octyloxy-17beta-(4-butyoxy)benzoyloxy estradiol	81.3	152.7	-71.4
4-Butyl-4'-hydroxyazobenzene (keto form)	14.93	86.3	-71.37
n-Butylstearate	132.75	203.5	-70.75
Docosamethylcycloundecasiloxane	82	152.5	-70.5
Snoutene	23.56	<0
Heptacyclo(6,6,02,6,03,13,04,11,05,9,08,1,O10,14)tetradecane	53.98	<0
