# Supplementary material for: Calculation of Five Thermodynamic Molecular Descriptors by Means of a General Computer Algorithm Based on the Group-Additivity Method: Standard Enthalpies of Vaporization, Sublimation and Solvation, and Entropy of Fusion of ordinary Organic Molecules and Total Phase-Change Entropy of Liquid Crystals
Source: Preprints.org preprint supplement (doi:10.20944/preprints201705.0169.v1), 2017-05-23
Supplement: Supplementary file 2 [file Compounds List of Heat-of-Fusion Outliers.xls]

## Sheet: Tabelle1
Outliers in deltaH(fus)
Molecule Name	dH(fus) exp.	dH(fus) calc.	Difference	Comment
17-Oxatritriacontane	318.9	88.7	230.2
Tetradecyl ether	281.7	79.5	202.2
15-Triacontene	269	79.5	189.5
Tetrapentacontane	216.2	105.5	110.7
Dotetracontane	176.54	85.1	91.44
Benzene hexa-n-pentanoate	55.8	146.1	-90.3
Hexatetracontane	175.3	91.8	83.5
2,7-Didodecyloxy-9-(3,5-didodecyloxyphenyl)carbazole	61.9	137.6	-75.7
Tetracontane	155.05	81.7	73.35
Rutin	82.3	15.4	66.9
1,4-Bis(2,4,5-triphenylcyclopentadienone-3-yl)benzene	68.8	9.7	59.1
20-Nonatriacontanone	153	102.8	50.2
Phenytoin	47.1	2.1	45
Diethyl 2,4,6,8-tetrahydro-4,8-ethanobenzo(1,2-c,4,5-c')dipyrrole-1,7-dicarboxylate	18.2	63.5	-45.3
4-Hexadecylphenyl-(6-(4-hexadecylphenyl)aminomethylene-9-methyl-9H-carbazol-3-ylmethylene)-amine	52.1	96.4	-44.3
4-Dodecylphenyl-(6-(4-dodecylphenyl)aminomethylene-9-methyl-9H-carbazol-3-ylmethylene)-amine	34.5	78	-43.5
Hexatriacontane	118.1	74.8	43.3
1-(p-Terphenyl-4-yl)-3-phenylbenzene	56	12.8	43.2
1,3-Bis(biphenyl-4-yl)benzene	55	12.8	42.2
Mesalamine	67.2	25.2	42
17-Phenyl testosterone	67.5	25.5	42
20-Methylnonatriacontane	120	78.7	41.3
2,7-Dihexyloxy-9-(3,5-dihexyloxyphenyl)carbazole	41.02	82.1	-41.08
4-Hexyloxyphenyl-(6-(4-hexyloxyphenyl)aminomethylene-9-methyl-9H-carbazol-3-ylmethylene)-amine	25.4	64.7	-39.3
Terfenadine	58.1	18.9	39.2
3beta-Octyloxy-17beta-(4-butyoxy)benzoyloxy estradiol	27	64.2	-37.2
2,2-Bis(3,5,5-trimethylhexanoyloxymethyl)-1,3-propanediyl bis(3,5,5-trimethylhexanoate	51.3	88.2	-36.9
Butyl 6-(acetylamino)-2-cyano-1(2H)-quinolinecarboxylate	36.4	2.6	33.8
