# Supplementary material for: Calculation of Five Thermodynamic Molecular Descriptors by Means of a General Computer Algorithm Based on the Group-Additivity Method: Standard Enthalpies of Vaporization, Sublimation and Solvation, and Entropy of Fusion of ordinary Organic Molecules and Total Phase-Change Entropy of Liquid Crystals
Source: Preprints.org preprint supplement (doi:10.20944/preprints201705.0169.v1), 2017-05-23
Supplement: Supplementary file 3 [file Compounds List of Heat-of-Sublimation Outliers.xls]

## Sheet: Tabelle1
Outliers in deltaH(sub)
Molecule Name	dH0(sub) exp.	dH0(sub) calc.	Difference	Comment
Tetraethylpyromellitate	103.6	197.5	-93.9
Isophthalamide	54.4	141	-86.6
Terephthalamide	57.3	141	-83.7
3,6-Diphenyl-1,2-dithiin	183.1	109.8	73.3
Hexamethoxycarbonylbenzene	154.3	227.5	-73.2
Eicosanedioic acid	170	229.8	-59.8
N-Benzyl-beta-alanine	171.6	112.1	59.5
1,1,1-Tris(ethoxycarbonyl)-2,2-diphenylethane	140.1	194	-53.9
2-Hydroxyphenazine di-N-oxide	197	145.2	51.8
N-3-Aza-1-thiaspiro(5,5)undec-2-en-2-ylbenzamide	92	143.4	-51.4
1-Aminotetrazole	116	65.2	50.8
Dotriacontane	271	223.2	47.8
Hexadecanedioic acid	155.4	202.2	-46.8
9-Fluorenyl-tris(ethoxycarbonyl)methane	143.2	189.5	-46.3
Ergosterol	118.8	164.9	-46.1
Benz(a)anthracene-7,12-dione	82.8	128.7	-45.9
Norcamphor	49			Sublimation < vaporization
