# Supplementary material for: Calculation of Five Thermodynamic Molecular Descriptors by Means of a General Computer Algorithm Based on the Group-Additivity Method: Standard Enthalpies of Vaporization, Sublimation and Solvation, and Entropy of Fusion of ordinary Organic Molecules and Total Phase-Change Entropy of Liquid Crystals
Source: Preprints.org preprint supplement (doi:10.20944/preprints201705.0169.v1), 2017-05-23
Supplement: Supplementary file 4 [file Compounds List of Heat-of-Vaporization Outliers.xls]

## Sheet: Tabelle1
Outliers in deltaH(vap)
Molecule Name	dH0(vap) exp.	dH0(vap) calc.	Difference
1,2,5,6-Tetrahydropyridine	107.7	41.9	65.8
Triethyleneglycol	60.5	96.8	-36.3
2,4-Hexanedione	23	59.1	-36.1
Thymine	134.1	98.3	35.8
Threitol	93.3	128.3	-35
Glycerol tricaprate	154.6	188.2	-33.6
Malathion	71.1	100.3	-29.2
1,3-Diethylbarbituric acid	81.4	110.6	-29.2
Dicyanoacetylene	28.9	56.6	-27.7
Methylorthosilicate	41.4	13.8	27.6
N-Acetyl-N-butylacetamide	64.4	90.8	-26.4
Ethylsilicate	48.5	22.3	26.2
1-Nitrodecafluoropiperidine	29.6	55.3	-25.7
Diglycolic anhydride	74.9	49.7	25.2
4-Amino-N-(4-cyanophenyl)benzenesulfonamide	147	122.6	24.4
omega-Bromoacetophenone	90.9	67.3	23.6
1,2-Dihydroxy-3-t-butylbenzene	73.5	96.9	-23.4
4-Amino-N-(3,4-dichlorophenyl)benzene sulfonamide	136.7	113.6	23.1
N,N-Dimethylamino-2-propen-3-al	71	48	23
3,5-Dimethylphenol	45.4	68.2	-22.8
3,4-Dimethylphenol	45.61	68.2	-22.59
Perfluorotetracosane	141	118.6	22.4
Hexachlorocyclopentadiene	67	45.3	21.7
Dibenzo-18-crown-6	137	115.3	21.7
(3-(Butylthio)propyl)triethoxysilane	47.1	68.1	-21
1,11-Undecanediol	131.7	111.4	20.3
3,4,5-Trichlorocatechol	79.3	99.5	-20.2
Tetrahydrothiopyran-4-one	72.63	52	20.63
Perchlorocyclopentene	80	60.3	19.7
4-Carbomethoxyhomocubane	80	60.4	19.6
Malonodinitrile	67.1	48	19.1
1,6-Imino-(10)annulene	59.29	77.1	-17.81
