# Supplementary material for: Calculation of Five Thermodynamic Molecular Descriptors by Means of a General Computer Algorithm Based on the Group-Additivity Method: Standard Enthalpies of Vaporization, Sublimation and Solvation, and Entropy of Fusion of ordinary Organic Molecules and Total Phase-Change Entropy of Liquid Crystals
Source: Preprints.org preprint supplement (doi:10.20944/preprints201705.0169.v1), 2017-05-23
Supplement: Supplementary file 5 [file Compounds List of tpc Entropy Outliers.xls]

## Sheet: Tabelle1
Outliers in DS(tpc) (J/mol/K)
Molecule name	dS(tpc) exp	dS(tpc) calc	Difference
4-Propyl-4'-hexadecyloxyazobenzene	387.25	140.6	246.65
4-Propyl-4'-nonyloxyazobenzene	322.95	112.4	210.55
4-Propyl-4'-dodecyloxyazobenzene	334.93	124.5	210.43
4-Propyl-4'-decyloxyazobenzene	298.73	116.4	182.33
4-Propyl-4'-octyloxyazobenzene	289.68	108.3	181.38
4-Propyl-4'-heptyloxyazobenzene	276.89	104.3	172.59
4-Propyl-4'-undecyloxyazobenzene	273.16	120.4	152.76
6-(10-Undecenyloxy)-2-naphthoic acid	342.95	118.3	224.65
6-(8-Nonenyloxy)-2-naphthoic acid	323.86	110.2	213.66
6-(7-Octenyloxy)-2-naphthoic acid	254.03	106.2	147.83
6-(4-Pentenyloxy)-2-naphthoic acid	231.28	94.1	137.18
1,10-Bis(4-(4'-tetradecyloxyphenylethynyl)phenoxy)decane	375.8	189.5	186.3
1,8-Bis(4-(4'-tetradecyloxyphenylethynyl)phenoxy)octane	349.94	181.4	168.54
1,9-Bis(4-(4'-tetradecyloxyphenylethynyl)phenoxy)nonane	344.16	185.5	158.66
1,10-Bis(4-(4'-hexyloxyphenylethynyl)phenoxy)decane	271.91	125	146.91
1,10-Bis(4-(4'-decyloxyphenylethynyl)phenoxy)decane	288.43	157.2	131.23
1,6-Bis(4-(4'-tetradecyloxyphenylethynyl)phenoxy)hexane	300	173.4	126.6
1,7-Bis(4-(4'-tetradecyloxyphenylethynyl)phenoxy)heptane	302.68	177.4	125.28
Octakis(hexadecanoyloxy)-9,10-anthraquinone	798.13	531.7	266.43
Octakis(tetradecanoyloxy)-9,10-anthraquinone	688.14	467.2	220.94
1,5-Dinonyloxy-2,3,6,7-tetraoctyloxy-9,10-anthraquinone	378.74	193.3	185.44
Octakis(pentadecanoyloxy)-9,10-anthraquinone	683.86	499.4	184.46
1,5-Didecyloxy-2,3,6,7-tetraoctyloxy-9,10-anthraquinone	362.18	201.3	160.88
1-(6-(3,6,7,10,11-Pentakis(decyloxy)triphenylen-2-yloxy)hexyloxy)-9,10-anthraquinone	56.98	195.2	-138.22
1,3-Phenylene bis(4-(3-fluoro-4-octadecyloxybenzoyloxy)-2-fluorobenzoate)	410.17	229.4	180.77
1,3-Phenylene bis(4-(3-fluoro-4-octadecyloxybenzoyloxy)benzoate)	382.31	227.3	155.01
1,3-Phenylene bis(4-(3-fluoro-4-hexadecyloxybenzoyloxy)-2-fluorobenzoate)	352.04	213.3	138.74
1,3-Phenylene bis(4-(3-fluoro-4-eicosyloxybenzoyloxy)-2-fluorobenzoate)	383.12	245.5	137.62
1,3-Phenylene bis(4-(3-fluoro-4-undecyloxybenzyoyloxy)-2-fluorobenzoate)	300.53	173	127.53
1,3-Phenylene bis(4-(3-fluoro-4-dodecyloxybenzyoyloxy)-2-fluorobenzoate)	308.11	181.1	127.01
1,3-Phenylene bis(4-(3-fluoro-4-hexadecyloxybenzoyloxy)benzoate)	326.53	211.1	115.43
1,3-Phenylene bis(4-(3-fluoro-4-tetradecyloxybenzoyloxy)benzoate)	304.48	195	109.48
2-Cyano-1,3-phenylene bis(4-(4'-tetradecylbiphenyl-4-carbonyloxy)-2-fluorobenzoate)	435.13	173.5	261.63
1,5-Bis(4-(2-Hydroxy-4-hexadecyloxybenzylideneamino)benzoyloxy)-3,3-dimethylpentane	371.75	208.8	162.95
1,5-Bis(4-(2-hydroxy-4-tetradecyloxybenzylideneamino)benzoyloxy)-3,3-dimethylpentane	316.13	192.6	123.53
1,6-Bis(4-dodecyloxyazobenzene-4'-carbonyloxy)hexane	522.53	194.1	328.43
1,4-Bis(4-dodecyloxyazobenzene-4'-carbonyloxy)butane	334.76	186	148.76
1,9-Bis(4-dodecyloxyazobenzene-4'-carbonyloxy)nonane	325.27	206.2	119.07
2,4,6-Tris(3,4,5-tridecyloxyphenyl)pyrimidine	62.29	270.3	-208.01
2,4- Bis(3',4',5'-tridecyloxyphenyl)-6-(3',4'-didecyloxyphenyl)pyrimidine	97.11	240.6	-143.49
Hexakis(hexyloxy)diquinoxalino(2,3-a,2',3'-c)phenazine	42.86	493.4	-450.54
4,4'-Bis(2-(2-methylbutoxy)ethoxy)biphenyl	285.34	70.2	215.14
Benzene hexa-n-decanoate	464.11	291.9	172.21
3,4,5-Tris(decyloxy)benzoic anhydride	98.7	265.7	-167
2,3,6,7,10,11-Hexaoctanoyloxytriphenylene	66.76	215.2	-148.44
2,3,6,7,10,11-Hexakis(4-octyloxybenzoyloxy)triphenylene	64.23	212.2	-147.97
1,3-Bis(4-(4-dodecyloxyphenylazo)phenoxy)-2-propanol	318.23	174.5	143.73
2,4,6-Trinitro-1,3,5-benzenetriyl tri(2,4,5-tris(decyloxy)benzoate)	198.55	337.4	-138.85
4-Hexadecyl-N-(4-pentadecyloxyphenylmethylene)benzenamine	316.29	185	131.29
1,8-Bis(4-(4'-decyloxyphenylethynyl)phenoxy)octane	280.46	149.2	131.26
4-Pentylphenyl 4-(4-(1-oxopentyl)cyclohexyl)benzoate	221.66	94.3	127.36
1-Ethyl-4-(2-(4-(2-(4-hexylbicyclo(2,2,2)oct-1-yl)ethyl)phenyl)ethyl)bicyclo(2,2,2)octane	65.07	190.4	-125.33
5,10,15,20-Tetrakis(4-hydroxyphenyl)porphyrin	73.34	<0
5,10,15,20-Tetrakis(4-octanoyloxyphenyl)porphyrin	147.88	<0
2,5-Bis(3,4,5-tripentyloxyphenyl)-1,3,4-oxadiazole	105.7	<0
2-(p-Terphenyl-4-yl)-5-phenyl-1,3,4-oxadiazole	82.32	<0
