# Supplementary material for: Calculation of Five Thermodynamic Molecular Descriptors by Means of a General Computer Algorithm Based on the Group-Additivity Method: Standard Enthalpies of Vaporization, Sublimation and Solvation, and Entropy of Fusion of ordinary Organic Molecules and Total Phase-Change Entropy of Liquid Crystals
Source: Preprints.org preprint supplement (doi:10.20944/preprints201705.0169.v1), 2017-05-23
Supplement: Supplementary file 8 [file Experimental and Calculated Heat-of-Fusion Data Table.xls]

## Sheet: Tabelle1
Molecule name	DH°(fus) exp	DH°(fus) calc	Deviation
4-Nitroguaiacol	21.69	22.4	-0.71
2-Oxoglutaric acid	28.59	27.2	1.39
p-Cresol	12.6	16	-3.4
4-Hydroxybenzaldehyde	21.6	22.4	-0.8
1-Naphthalenecarboxylic acid	14.1	17	-2.9
Ibuprofen	23.1	23.5	-0.4
2-Naphthoic acid	13.8	17	-3.2
4-Methylbenzoic acid	15.4	17.9	-2.5
2-Amino-3-methylbenzoic acid	27.3	26.2	1.1
1,4-Dinitrobenzene	17.58	19.4	-1.82
4-Methoxybenzamide	21.3	22	-0.7
2,8-Dichlorodibenzofuran	27.2	26.4	0.8
Acenaphthylene	3.9	9.8	-5.9
2-Methoxy-5-nitrophenol	21.43	22.4	-0.97
4-Phenyltoluene	11.2	14.9	-3.7
2-Thiophenecarboxylic acid	21	22.1	-1.1
Succinonitrile	9.84	14.3	-4.46
Saprorthoquinone	23.1	23.6	-0.5
Ethyl 4,7-dihydro-4,7-ethano-2H-isoindole-1-carboxylate	45.4	39.2	6.2
2,4-Dichlorophenol	19	20.3	-1.3
1,12-Dodecanediamine	67.1	53.9	13.2
Ambroxol	31.5	29	2.5
2-Amino-6-methylbenzoic acid	27.5	26.2	1.3
p-Toluidine	21	22.2	-1.2
3-Acetylthiophene	19.4	21.1	-1.7
4-Fluoroacetophenone	15.1	17.5	-2.4
2-Methoxybenzamide	21.6	22	-0.4
2,6-Dichloro-4-nitroaniline	29.48	28.2	1.28
2,6-Diphenyl-1,4-dithiin	24.6	24.8	-0.2
N-(2,3-Dichlorophenyl)benzenesulfonamide	27.2	25.9	1.3
4-Bromoiodobenzene	16.9	18.7	-1.8
2-Amino-5-methylbenzoic acid	27.63	26.2	1.43
1,14-Tetradecanedioic acid	56.5	47.1	9.4
4-Fluoronitrobenzene	14.9	17.3	-2.4
Thymoquinone	18.2	19.6	-1.4
3-Chlorophenylacetic acid	22	23	-1
1,3-Dimethyl-2,4-dinitro-5-t-butylbenzene	16.7	19.3	-2.6
4-Bromotoluene	15.1	18.2	-3.1
Hexamethylbenzene	12.8	16.6	-3.8
Perfluorotetradecane	24.6	24.9	-0.3
Isoproturon	21.3	22.6	-1.3
p-Anthranilic acid	24.5	23.9	0.6
Hydroxyacetic acid	18	20.3	-2.3
Dimethylacetamide	10.2	13.9	-3.7
1-Acetyladamantane	18.5	19.7	-1.2
Ethyl methyl carbonate	11.24	14.6	-3.36
Chrysanthemic acid	14.5	17.9	-3.4
Phenazine	26.2	26.1	0.1
Dodecanedioic acid	49.8	42.6	7.2
3-Methoxybenzamide	21.9	22	-0.1
4-Bromoacetophenone	17	19.7	-2.7
2-t-Butyl-5-methylphenol	12.5	15.4	-2.9
Naproxen	23.4	24.2	-0.8
Benzo[e]pyrene	4.8	11.2	-6.4
N-Methylbenzamide	16.1	17.9	-1.8
N-(4-Nitrophenyl)benzenesulfonamide	20.8	22.4	-1.6
N,N'-Bis(3-methoxyphenyl)urea	36.76	32.3	4.46
2,4-Difluoronitrobenzene	14.3	16.6	-2.3
2,3-Dichlorophenol	19.6	20.3	-0.7
Nonanedioic acid	40.2	36	4.2
1,4-Dichlorobenzene	19.3	21.4	-2.1
Isobutyramide	19.2	20	-0.8
Tricyclo[4.2.2.02,5]deca-3,7,9-triene	1.5	7.6	-6.1
1-Octadecanol	66.6	54.5	12.1
1,2-Dihydronaphthalene	10.5	15.3	-4.8
cis-1,2-Cyclohexanediol	20.27	20.7	-0.43
2,6-Dichlorophenol	19.7	20.3	-0.6
2-Methylbenzimidazole	21.08	22.7	-1.62
Adiponitrile	18	19.1	-1.1
4-Chlorophenylacetic acid	23.6	23	0.6
2,4,6-Trichlorodibenzofuran	31.9	28.8	3.1
N-(4-Bromophenyl)-4H-3,1-benzothiazin-2-amine	24.5	23.6	0.9
2-Bromonaphthalene	15.5	17.3	-1.8
4-Iodotoluene	15.5	17.3	-1.8
1-Thiaindan	14.8	16.8	-2
1,2-Ethanediol dinitrate	33.3	29.7	3.6
Methyl 4-methylbenzoate	23.5	24.5	-1
Phenol	10.9	15.7	-4.8
2,3-Dichlorodibenzofuran	26.2	26.4	-0.2
2,6-Dioxaadamantane	9.6	14.8	-5.2
1-Nonadecanol	72.4	58.7	13.7
trans-3-Methoxycinnamic acid	22.6	23.9	-1.3
Dimethylene urethane	17.3	20.2	-2.9
N-Methylnicotinamide	19.2	19.8	-0.6
4-Phenylpyridine	13	17.2	-4.2
Salicylsalicylic acid	29	28.4	0.6
Octadecane	51.7	42.5	9.2
4-Methoxybenzoic acid	21.8	23.4	-1.6
2-Hydroxy-4-methoxybenzophenone	21.8	23.4	-1.6
1,3,5-Tribromobenzene	21.72	21.5	0.22
1,12-Dodecanediol	51.2	42.1	9.1
Perylene	7	11.2	-4.2
2-Methylbenzoic acid	16.6	17.9	-1.3
Phenylacetic acid	19.9	20.2	-0.3
Dodecane	38.1	32.9	5.2
4-Bromophenol	15.5	17.1	-1.6
Dibenzofuran	19.4	21.8	-2.4
2,2-diphenyl-1,3-dioxolane	15.1	16.8	-1.7
N-(4-Methyl-2-nitrophenyl)acetamide	20.97	20.9	0.07
1,10-Decanediol	42.1	37.7	4.4
Tetradecanedinitrile	41.94	37.6	4.34
N-(4-Methylphenyl)-4H-3,1-benzothiazin-2-amine	19.9	22.2	-2.3
3,4-Dichloronitrobenzene	20.6	22.7	-2.1
Hexabromobenzene	24.6	25.5	-0.9
Phenacetin	25.2	23.8	1.4
Pyrimidine	14.2	16.1	-1.9
1,3-Diiodobenzene	16.5	17.7	-1.2
Suberonitrile	21.97	23.7	-1.73
2-Imidazolidinone	15.1	16.7	-1.6
2-Aminophenol	21.7	21.3	0.4
5-Hydroxymethyl-5,6-dihydro-7H-dibenzo[a,c]cycloheptane	16	17.3	-1.3
Pentanedinitrile	12.03	16.8	-4.77
2,4,6-Tribromophenol	20.9	20.7	0.2
Musk xylene	20.8	20.6	0.2
1,3,5,7-Tetrachloronaphthalene	27.1	25	2.1
1,2,4,5-Tetrabromobenzene	24.4	23.1	1.3
1,2,3,5,7-Pentachloronaphthalene	27.1	27.4	-0.3
Perfluorotridecane	23.7	22.6	1.1
Quinaldine	12.5	17.2	-4.7
trans-1,2-Cyclohexanediol	21	20.7	0.3
1,8-Bis(dimethylamino)naphthaline	18	18.6	-0.6
2-Chlorophenylacetic acid	24.3	23	1.3
Benzo[ghi]perylene	4	8.8	-4.8
2,9-Dimethyl-1,10-phenanthroline	17.6	18.3	-0.7
Butanedioic acid	23.6	25	-1.4
3-Thiophenecarboxylic acid	18.3	21.3	-3
2-Chloronitrobenzene	20.5	20.3	0.2
Perfluoropentadecane	26.7	27.2	-0.5
Ethylcarbamate	26.7	27.2	-0.5
Benzo[a]pyrene	3.8	11.2	-7.4
Fluorene	7.8	11.4	-3.6
4-Chloro-2-nitrophenol	22.69	21.8	0.89
3-Aminophenol	22	21.3	0.7
Biphenyl	13	15	-2
Vioxx	12	14.3	-2.3
Lophine	35.9	31	4.9
Sebaconitrile	28.2	28.3	-0.1
2,5-Dichlorophenol	20.6	20.3	0.3
6-Methyl-1,2,3,4-tetrahydro-1-oxocarbazole	26.9	24.7	2.2
4-(Phenylmethoxy)benzeneacetic acid	29.3	29.1	0.2
2-Pentadecanone	53.9	46.3	7.6
3-Chlorophenol	13.4	18	-4.6
1,2,3,4-Tetrachloronaphthalene	23.4	25	-1.6
2-(4-Nitrophenyl)-1-(4-(4-butylcyclohexyl)phenyl)ethanone	36.4	34.1	2.3
Propylenecarbonate	9	12.1	-3.1
1-Phenyldodecane	45.5	40.5	5
1,4-Dihydronaphthalene	9.4	15.3	-5.9
2-Chloronaphthalene	13.4	18.1	-4.7
1,10-Phenanthroline	19.4	22.3	-2.9
o-Toluamide	15.4	16.5	-1.1
4-Chlorophenol	13.2	18	-4.8
Methyl 4-hydroxybenzoate	25.3	23.4	1.9
3,4,5-Trimethoxyphenol	31.9	31.1	0.8
2,2,4-Trimethyl-1,3-pentanediol	24.2	22.6	1.6
Benzoic acid	17.5	17.9	-0.4
Benzamide	15.5	16.5	-1
4-Methoxy-2-nitrophenol	22.42	24.5	-2.08
1,4,7,10-Tetrathiacyclododecane	31	30.5	0.5
1,4-Dinitropiperazine	20.8	20.2	0.6
4-Iodoaniline	19.98	22.8	-2.82
o-Cresol	14.8	16	-1.2
1,4-Dibromobenzene	20.39	19.9	0.49
1,3-Dinitrobenzene	19.68	19.4	0.28
Nortricyclene	1.2	9.7	-8.5
4-Amino-3-methylbenzoic acid	21.8	24.1	-2.3
1,4,7-Trithiacyclononane	29	25.9	3.1
epsilon-Caprolactam	16.2	20.2	-4
18-Hexylpentatriacontane	107	80.4	26.6
1,4-Dimethylnaphthalene	10.6	16.3	-5.7
2,4,6-Tribromoaniline	25.75	26.9	-1.15
Dibenzo[b,d]thiophene	19.2	19	0.2
2,3:6,7-Dibenzocycloocta-2,6-dien-1-one	17.2	17.6	-0.4
2-Nitrophenol	17	20.8	-3.8
Dodecanedinitrile	34.3	32.9	1.4
N-(4-Chlorophenyl)benzenesulfonamide	25.8	23.6	2.2
Benzo[b]fluoranthene	2.4	7.2	-4.8
4-(4-Propylcyclohexyl)benzonitrile	21.5	24	-2.5
Phenanthrene	13	14.6	-1.6
1,2,4-Tribromobenzene	17.9	21.5	-3.6
1-Ethyladamantane	11.3	13.4	-2.1
4-Chloronitrobenzene	16.17	20.3	-4.13
Khellin	32.3	31.6	0.7
Decanedioic acid	47	38.3	8.7
2-Nitrodiphenylamine	26.14	23.7	2.44
Tetradecanoic acid	57.9	45.9	12
1,10-Decanediamine	57.8	49.5	8.3
2-Ethylanthracene	16.2	16.7	-0.5
2,3,5,6-Tetramethyl-1,4-benzoquinone	18.4	22	-3.6
2,3-Butyleneglycol	10.8	16.7	-5.9
2-(2-Benzofuryl)-2-imidazoline	26	23.5	2.5
Ethyl 8-(hydroxymethyl)-6-phenyl-2-oxo-2H-1-benzopyran-3-carboxylate	43.1	39.3	3.8
2,4,8-Trichlorodibenzofuran	33.6	28.8	4.8
Benzene	10.6	16.6	-6
3-Amino-4-methylbenzoic acid	26.9	24.1	2.8
2-Indanone	16.9	17.1	-0.2
2:3,6:7-Dibenzobicyclo[3.2.2]nona-2,6-dien-4-one	10.9	12.9	-2
2-Iodoaniline	19.38	22.8	-3.42
2-(4-Nitrophenyl)-1-(4-pentylphenyl)ethanone	29.5	29.9	-0.4
Pyrazine	15.9	20.4	-4.5
Chloroacetic acid	16.3	20.7	-4.4
1-(4-Nitrophenylethynyl)-4-pentylbenzene	21.5	20.2	1.3
N-Benzyl-pivalophenone imine	28.1	24.8	3.3
4-Fluorophenol	14.1	15	-0.9
Dicyanomethane	11.1	12.9	-1.8
2,5-Norbornadiene	10.1	12.2	-2.1
2,6-Dimethylquinoline	17.4	17.3	0.1
3-t-Butylphenol	14.7	15.4	-0.7
1,2,4,5,6,8-Hexachloronaphthalene	28.9	29.6	-0.7
2-Fluorobenzonitrile	4	12.2	-8.2
3-Fluorobenzonitrile	4	12.2	-8.2
N-(4-Chlorophenyl)-4H-3,1-benzothiazin-2-amine	27.5	24.3	3.2
3-Fluoronitrobenzene	17.5	17.3	0.2
2-(2,4-Dichlorophenoxy)propanoic acid	32	31.8	0.2
2,3-Dinitrophenol	22.67	20.9	1.77
4-Acetylphenol	18.1	17.7	0.4
1-Bromo-4-chlorobenzene	15.8	20.5	-4.7
Butanamide	19.2	22.9	-3.7
Nitrofungin	20.88	19.6	1.28
Decane	28.9	29.7	-0.8
1,8-Octanediol	33.9	33.2	0.7
Dibenz[ah]anthracene	10.9	12.6	-1.7
9,10-Dihydrophenanthrene	12.2	13.5	-1.3
Methyl 2-thiopheneacetate	36.1	30.2	5.9
Xanthene	20.7	24	-3.3
p-Terphenyl	11.8	13.2	-1.4
2,7-Dichlorofluorene	16.4	16.4	0
9-Methylanthracene	13.7	14.5	-0.8
3-Nitrobenzamide	18.3	17.7	0.6
4-Dimethylaminopyridine	21.6	20	1.6
trans-4-Methoxycinnamic acid	27.2	23.9	3.3
2,6-Dinitrophenol	22.91	20.9	2.01
4-Nitrophenol	11	17.3	-6.3
Fenchone	15.5	15.7	-0.2
Dodecanamide	46	41.8	4.2
1,6-Hexanedioic acid	28.4	29.5	-1.1
4-Chloroaniline	21.1	24.4	-3.3
1-Hexadecanol	57.7	50	7.7
Methyl 4-bromobenzoate	23.2	25.9	-2.7
1-Indanone	17.6	17.1	0.5
4-Chloroacetophenone	15.7	20.7	-5
1,2,3-Trichloronaphthalene	18.4	22.6	-4.2
2-Chlorofluorene	13.4	14.1	-0.7
2-Hydroxydiphenylmethane	17	16.6	0.4
1,3-Dioxolan-2-one	13	13.8	-0.8
3-Chloronitrobenzene	22.3	20.3	2
1-Methylimidazole	14.9	20.2	-5.3
Tritane	14.6	14.9	-0.3
4-Aminophenol	23.8	21.3	2.5
Quinazoline	18	17.2	0.8
2,4'-Bipyridine	17	16.5	0.5
Pentabromophenol	27.6	23.9	3.7
Corannulene	4	7.4	-3.4
1-Adamantanol	14.6	14.8	-0.2
Thioxanthene	23.9	21.3	2.6
4-Ethoxybenzoic acid	26.4	28.4	-2
Ethyl 4-hydroxybenzoate	26.4	28.4	-2
3,5-Dichloroanisole	23.68	26.5	-2.82
1-(4-Nitrophenylethynyl)-4-butoxybenzene	21.8	25.2	-3.4
2,6-Dibromoaniline	21.79	25.2	-3.41
2-(4-Nitrophenyl)-1-(4-(4-propylcyclohexyl)phenyl)ethanone	38.9	31.7	7.2
2-Tetradecanone	48.8	44.1	4.7
Adamantane	6.3	14.4	-8.1
n-Octanoic acid	32.3	32.6	-0.3
(2-Furyl)oxoacetamide	17.8	16.9	0.9
2-Chlorodibenzofuran	20.1	24.1	-4
3-Chlorodibenzofuran	20.1	24.1	-4
Carbazole	10.4	11.7	-1.3
2-Hydroxymethyl-1,4-benzodioxan	28.8	30.2	-1.4
Hexanamide	24.6	27.3	-2.7
4-Formylbenzoic acid	21.3	25	-3.7
1,4,8,11-Tetrathiacyclotetradecane	35.7	35.1	0.6
Malonic acid	23.1	26.3	-3.2
3-Chlorobenzoic acid	23.7	20.9	2.8
Coronene	3.1	6.5	-3.4
18-Butylpentatriacontane	104	77	27
Musk ketone	23.8	20.9	2.9
2-(4-Nitrophenyl)-1-(4-propoxyphenyl)ethanone	32	32.6	-0.6
1,2,3,4-Tetrachlorodibenzofuran	38.4	31.1	7.3
3-Nitrophenol	18.1	16.9	1.2
2,4-Dibromoaniline	21.37	25.2	-3.83
N-Palmitoyl-pyrazinamide	51.8	46.5	5.3
Caprylamide	30.48	31.6	-1.12
Indole	12.3	18.9	-6.6
1,2,3,7-Tetrachlorodibenzofuran	38.5	31.1	7.4
Lifibrol	38.1	30.8	7.3
1,2,3,4,6,7,8-Heptachlorodibenzo-p-dioxin	57.3	50.4	6.9
1,6-Dimethylnaphthalene	8.5	16.3	-7.8
3-Thiopheneacetic acid	18.8	23.5	-4.7
1,2,4,5-Tetrachlorobenzene	22.5	26.1	-3.6
1,3,6,8-Tetrachlorodibenzofuran	38.6	31.1	7.5
1,3-Benzodioxole-5-carboxylic acid	30.5	31.7	-1.2
2-Fluoronitrobenzene	18.9	17.3	1.6
4-Iodophenol	17.2	16.1	1.1
2-Hydroxybenzylalcohol	21.5	19.1	2.4
Valeramide	21	25.1	-4.1
Oxalamide	11.7	18.6	-6.9
N-(2-Cyanoethyl)aniline	20.38	18.3	2.08
1,3,7,9-Tetrachlorodibenzofuran	38.7	31.1	7.6
1,3,5-Trimethoxybenzene	32.4	33.1	-0.7
Naphthalene	16.4	15.5	0.9
Benz[a]anthracene	13.7	13.6	0.1
Tetracosanoic acid	82.3	68	14.3
1-(4-Nitrophenylethynyl)-4-pentyloxybenzene	33.6	27.5	6.1
2-Nitrobenzamide	19.6	17.7	1.9
4-Amino-N-(5-chloro-2-methylphenyl)benzenesulfonamide	26	28.7	-2.7
Tetradecane	46	36.1	9.9
1,2,4,5,6-Pentachloronaphthalene	24.1	27.4	-3.3
Undecanedioic acid	42.8	40.5	2.3
2-(4-Nitrophenyl)-1-(4-ethoxyphenyl)ethanone	28.2	30.3	-2.1
2,2'-Bipyridine	14.8	14.2	0.6
1-Octanol	31.1	32.4	-1.3
2,2'-Bithiophene	16.5	22.2	-5.7
Diphenylmethane	19	17.1	1.9
Triphenylene	14	13.6	0.4
3,4-Difluoronitrobenzene	18.3	16.6	1.7
Nonadecane	47.8	44.1	3.7
Ferulic acid	17.9	23.2	-5.3
p-Toluamide	18.2	16.5	1.7
1,2,7,8-Tetrachlorodibenzofuran	39.1	31.1	8
2,4-Dichlorophenoxyacetic acid	32	33.1	-1.1
Pyrene	12.1	12.2	-0.1
1,2,3,5,8-Pentachloronaphthalene	23.8	27.4	-3.6
Piperazine	16.7	15.4	1.3
m-Toluamide	18.3	16.5	1.8
4-Methoxyphenol	14.7	21.1	-6.4
2,2'-Dihydroxybenzophenone	20.1	17.7	2.4
Methyl octacosanoate	103.8	83.4	20.4
1,5,9-Trithiacyclododecane	31.4	32.8	-1.4
Cholest-5-en-3-ol	26.5	29.4	-2.9
2,5-Dibromoaniline	20.47	25.2	-4.73
1,2,4,5-Tetraisopropylbenzene	19.6	24.6	-5
Formamide	11.6	11.7	-0.1
Pimelonitrile	15	21.4	-6.4
4-Iodoacetophenone	21.8	18.8	3
Diphenylamine	19.8	17.4	2.4
2,3,7,8-Tetrachlorodibenzofuran	39.4	31.1	8.3
4-Methylbenzylalcohol	21.11	18.3	2.81
1-Naphthylamine	14.8	21.3	-6.5
Hexamethyleneglycol	25.5	28.8	-3.3
Tetrahydrodicyclopentadiene	4.32	14	-9.68
4-Ethoxyisonitrosoacetanilide	7.6	8.8	-1.2
1,4-Benzoquinone	18.4	16.3	2.1
1-Methyl-3,5-diphenylpyrazole	17.5	23.3	-5.8
2,4-Dinitrobenzaldehyde	21.2	25.9	-4.7
2,3-Dichloroanisole	22.04	26.5	-4.46
2-t-Butyl-4-methylphenol	17.2	15.4	1.8
4-Nitrobenzamide	20.5	17.7	2.8
trans-Cyclohexyl-1,4-diamine	27	30	-3
4,5-Dicyano-1-methylimidazole	9.5	10	-0.5
8-Quinolinol	22.1	18.8	3.3
2-(4-Nitrophenyl)-1-(4-(4-ethylcyclohexyl)phenyl)ethanone	37.3	29.4	7.9
4-t-Butylbenzoic acid	9.2	17.6	-8.4
trans-Decahydroquinoline	24.6	20.5	4.1
1,2,3-Trichlorobenzene	17.9	23.7	-5.8
Monomethyl phthalate	21.6	26.3	-4.7
Vitavax	28.2	23	5.2
trans-Cinnamic acid	22.2	18.8	3.4
N,N,N-Tris(3-methylphenyl)amine	13.07	12.4	0.67
2-Chlorobenzoic acid	25.3	20.9	4.4
m-Cresol	6.9	16.1	-9.2
1,2,4,7,8-Pentachlorodibenzofuran	43.2	33.4	9.8
Ethriol	17.3	23.4	-6.1
3,4-Dichloroaniline	21.69	26.5	-4.81
1,2-Dihydroxybenzene	16.4	14.6	1.8
4-Amino-N-(4-ethylphenyl)benzenesulfonamide	24.8	28.7	-3.9
5-nitro-1,3-Benzodioxole	28.2	31.1	-2.9
1,2,3,6,7-Pentachloronaphthalene	22.9	27.4	-4.5
1,3,5-Trichlorobenzene	17.6	23.7	-6.1
Benzo[b]triphenylene	13.6	12.6	1
3,5-Di-t-butylsalicylic acid	22.92	19.1	3.82
2,3:7,8-Dibenzocycloocta-2,7-dien-1-one	20.8	17.6	3.2
Methylacetamide	11.4	19.4	-8
Octachlorodibenzo-p-dioxin	59	52.7	6.3
Hydrocortisone hemisuccinate	41.3	31.9	9.4
2,2-Dimethoxybutane	9.32	18	-8.68
2-(4-Nitrophenyl)-1-(4-(4-propylcyclohexylethyl)phenyl)ethanone	35.6	36.4	-0.8
Azulene	15.2	13.6	1.6
5-Nitro-8-hydroxyquinoline	24.7	20.2	4.5
Octacosane	67	58.4	8.6
Propanamide	12.9	20.6	-7.7
Propyl 4-hydroxybenzoate	27.2	30.6	-3.4
2-Isopropyl-5-methylphenol	20.6	17.3	3.3
1,2,4,6,7-Pentachloronaphthalene	22.6	27.4	-4.8
Methyl hexacosanoate	96.4	79	17.4
Cannabinol	17	23.5	-6.5
Salicylic acid	24.5	20	4.5
2-Acetoxyacetophenone	30.3	32.8	-2.5
2-Bromobenzoic acid	24.8	20.2	4.6
Piperonylonitrile	20.8	26.2	-5.4
4-t-Butylphenol	18	15.4	2.6
Silybin	44.9	34.2	10.7
2-Methyl-2-butanol	6.6	16.3	-9.7
3-Bromobenzoic acid	24.9	20.2	4.7
Acenaphthene	16.2	14.1	2.1
1,2,3,6,7,8-Hexachlorodibenzo-p-dioxin	51.9	48	3.9
3,5-Di-t-butyltoluene	18.5	15.7	2.8
1,8-Dimethylnaphthalene	18.53	15.7	2.83
1,2,3,4-Tetrahydrodibenzothiophene	32	25.1	6.9
18-Methylpentatriacontane	99	71.9	27.1
4-Amino-N-(2,5-dichlorophenyl)benzene sulfonamide	27.6	31.1	-3.5
Bicyclopentyl	13.7	21.4	-7.7
1-Adamantanecarboxylic acid	11.4	19.8	-8.4
1,2,3,4,7,8-Hexachlorodibenzo-p-dioxin	51.7	48	3.7
4-Pyridinemethanol	11.78	20.1	-8.32
4-Bromoaniline	16.75	23.6	-6.85
2-Oxaadamantane	8.1	17.6	-9.5
3-Methyl-4-hydroxybenzaldehyde	22.4	27.6	-5.2
16-Hentriacontanone	117.1	84.4	32.7
Isopropyl t-butyl ether	8.5	17.9	-9.4
Benzil	22.9	18.5	4.4
Sulfacetamide	29.8	23.3	6.5
Xylitol	33.26	25.7	7.56
2,4,6-Trichlorophenol	15.1	22.6	-7.5
Benzo[k]fluoranthene	6.8	7.2	-0.4
4-Bromo-4'-(3-butenyloxy)biphenyl	29.1	32.4	-3.3
Suberic acid	31.1	33.8	-2.7
Monuron	29.3	22.9	6.4
Hexadecanamide	55.8	51.1	4.7
Pimelic acid	27.9	31.6	-3.7
8-Methylquinoline	10.7	19.6	-8.9
Methyl 4-chlorobenzoate	21	26.8	-5.8
2-Bromofluorene	15.5	13.2	2.3
Fenofibrate	32.4	34.8	-2.4
1,3-Diphenylacetone	27	21.2	5.8
1,13-Tridecanedioic acid	49.4	46.7	2.7
1,5-Dimethylnaphthalene	20	16.3	3.7
1-(4-Nitrophenylethynyl)-4-ethoxybenzene	26.02	20.5	5.52
1,4-Dihydroxybenzene	17.6	14.6	3
2,4,6-Trinitrotoluene	26.2	20.6	5.6
1,2,3,7,8,9-Hexachlorodibenzo-p-dioxin	51.2	48	3.2
4-t-Butylcatechol	2.8	14.2	-11.4
N-(4-Acetylphenyl)-4H-3,1-benzothiazin-2-amine	16.1	23.5	-7.4
2,2'-Dinitrodiphenylamine	18.36	25.1	-6.74
N-(2-Methyl-4-chlorophenyl)-4H-3,1-benzothiazin-2-amine	17.5	24.5	-7
2-Naphthol	18	14.8	3.2
1,2,4,6,7,9-Hexachlorodibenzo-p-dioxin	51.1	48	3.1
2-(4-Nitrophenyl)-1-(4-(4-pentylcyclohexyl)phenyl)ethanone	34.5	36.4	-1.9
2-Bromoaniline	16.14	23.6	-7.46
Ethyl 5-phenylsulfonyl-4,7-dihydro-4,7-ethano-2H-isoindole-1-carboxylate	29.8	23	6.8
4-Fluorobenzamide	19.5	15.8	3.7
9-Methyl-9H-fluorene	12.4	10.8	1.6
2-Methylacetanilide	21.7	17.3	4.4
4-Amino-N-(2,3-dichlorophenyl)benzene sulfonamide	26.8	31.1	-4.3
4-Iodobenzoic acid	23.3	18.4	4.9
2,3,4,7,8-Pentachlorodibenzofuran	44.8	33.4	11.4
1,2-Dihydro-1,6-dimethylphenanthro[1,2-b]furan-10,11-dione	22.2	17.6	4.6
4-Ethylbenzoic acid	11	20.1	-9.1
Undecanedinitrile	26	30.6	-4.6
Methyl 4-dimethylaminobenzoate	19.1	25.8	-6.7
Glutaric acid	21.1	27.2	-6.1
2-Iodofluorene	14.6	12.2	2.4
1-Phenyl-4,7-dioxaspiro[2.4]heptane	20.5	16.3	4.2
Amitraz	19.5	15.6	3.9
Cannabidiol	28.4	32.4	-4
2,7-Dichlorodibenzo-p-dioxin	37.4	38.7	-1.3
m-Anisic acid	15.5	23.4	-7.9
2,3,7,8-Tetrachlorodibenzo-p-dioxin	44.1	43.4	0.7
4-Acetylanisole	15.9	23.7	-7.8
N-Cyclohexyl-2,4,6-trimethylbenzaldehyde imine	26.2	30.9	-4.7
1,4,7,10,13-Pentathiacyclopentadecane	32.2	35.1	-2.9
1,6-Hexanediamine	40.2	40.7	-0.5
2-Benzoylpyridine	20.91	16.5	4.41
4-t-Butylbiphenyl	18.1	14.5	3.6
2-Adamantanol	22.4	17.5	4.9
2-Nitrobenzonitrile	17.3	13.9	3.4
Octyl urea	36.2	38	-1.8
1,4,7,10,13,16-Hexaoxacyclooctadecane	53.6	50.2	3.4
Anthracene	18.4	14.6	3.8
Diphenylcarbonate	26.7	20.4	6.3
Dimethyl carbonate	11.6	9.8	1.8
N,N-Dimethylnicotinamide	17.9	14.2	3.7
9,10-Dimethylanthracene	18.5	14.6	3.9
1,2,3,7,8-Pentachlorodibenzofuran	45.4	33.4	12
Methyl trans-cinnamate	33.1	24.8	8.3
Decanamide	35	37.3	-2.3
Neopentyl alcohol	8.5	18.8	-10.3
2-Iodonaphthalene	21	16.3	4.7
1-Nitro-2,6-diisopropylbenzene	12.2	21.4	-9.2
1,2,3,5-Tetrachlorobenzene	18.9	26.1	-7.2
o-Terphenyl	16.6	13.2	3.4
3,4,5-Trimethoxybenzoic acid	29.9	33.8	-3.9
1,1-Diethoxyethane	11	20.6	-9.6
1,3-Dimethyladamantane	10.9	9.2	1.7
Chrysene	17.2	13.6	3.6
4-Chlorobiphenyl	6.7	17.6	-10.9
Benzal diacetate	27.3	32	-4.7
Azelanitrile	18.7	26	-7.3
Methylbenzene	5.1	16.5	-11.4
1-Methylindole	12.1	10	2.1
1,3,5-Triphenylbenzene	14.4	11.6	2.8
3,4-Dichlorophenol	10.5	20.3	-9.8
2-Bromoacetophenone	26	19.7	6.3
Cetane	53.9	39.2	14.7
1-Methylfluorene	14	11.3	2.7
N,N-Dimethylformamide	8.9	7.7	1.2
1,2,3,4-Tetrachlorobenzene	18.7	26.1	-7.4
4-(2,4-Dichlorophenoxy)butyric acid	35	37.5	-2.5
1,8-Diaminonaphthalene	19.4	26.6	-7.2
4-Chloro-3-nitrophenol	25.97	19.6	6.37
4,4'-Dichlorobiphenyl	9.8	19.9	-10.1
4-Fluorobenzonitrile	15.4	12.2	3.2
2-Piperidone	8.2	18.8	-10.6
4-t-Pentylphenol	23	17.5	5.5
2-Chloroacetophenone	27.6	20.7	6.9
2-Furoic acid	22.6	17.2	5.4
[2,2]Paracyclophane-1-ene	17.6	13.7	3.9
2-Phenylnaphthalene	17.9	13.9	4
Nonyl urea	38.9	40.3	-1.4
Pentafluorophenol	15.2	12	3.2
Phenylcarbamate	22.12	28.6	-6.48
9-Phenylanthracene	16.7	13	3.7
Hesperetin	35.9	26.4	9.5
Acetopiperone	26.2	31.5	-5.3
1-Benzylimidazole	22.9	17.3	5.6
1H-Indene-1,3(2H)-dione	21.8	16.5	5.3
n-Decyl alcohol	33.7	36.8	-3.1
Diethylcarbonate	9.2	19.7	-10.5
Bromoacetic acid	13.9	23	-9.1
3-Fluorobenzamide	20.9	15.8	5.1
4,7-Phenanthroline	30.2	22.3	7.9
trans-2-Methoxycinnamic acid	32.5	23.9	8.6
Pivalamide	24.1	18	6.1
9H-Fluoren-9-one	14.1	11	3.1
4-Methoxy-alpha-methylstyrene	19.1	26.7	-7.6
Norbornane	4.45	16.5	-12.05
trans-Stilbene	19.9	15	4.9
2-Biphenyl methanol	21.5	16.1	5.4
5H-10,11-Dihydrodibenzo[a,d]cyclohexane-5-ol	19	14.3	4.7
Di-t-butyl-isopropylmethanol	2.3	15.1	-12.8
Azacyclononan-2-one	17	25.4	-8.4
Cyclotetradecane	30.3	34.7	-4.4
2-Bromo-7-chlorofluorene	20.8	15.5	5.3
Tamoxifen	34	37.3	-3.3
1,2,4,6,8-Pentachloronaphthalene	19.8	27.4	-7.6
Heptadecane	39.1	40.9	-1.8
Behenyl alcohol	71.1	63.3	7.8
2-(4-Nitrophenyl)-1-(4-(4-butylcyclohexylethyl)phenyl)ethanone	35.9	38.7	-2.8
p-Bromoacetanilide	25.8	18.9	6.9
1-(4-Nitrophenylethynyl)-4-propoxybenzene	31.4	22.8	8.6
1,8-Octanediamine	45	45.1	-0.1
Glibenclamide	46.3	33.2	13.1
2,4-Dichlorobenzaldehyde	20.5	28	-7.5
1,4,8,11-Tetrathiacyclohexadecane	37.2	39.7	-2.5
4-Nitrobenzylideneaniline	24.6	30.9	-6.3
Monomethyl isophthalate	36.5	26.3	10.2
2,7-Dimethylnaphthalene	22.2	16.3	5.9
1-Dodecanol	39.3	41.2	-1.9
Nicotinic acid	28.38	20.6	7.78
1,4-Di-t-butylbenzene	21.4	15.7	5.7
1H,1H-Perfluorotetradecan-1-ol	32.4	36.4	-4
alpha-Phenyl-1-piperidinoacetonitrile	19.7	14.5	5.2
Estra-1,3,5(10)-triene-3,17-diol(17beta) 3-benzoate	41.8	29.9	11.9
Dimethylterephthalate	26.3	32.2	-5.9
Dodecyl urea	47.9	47.3	0.6
2,4-Di-t-butylphenol	20.5	15	5.5
Atenolol	38.7	27.7	11
Methyl tetracosanoate	86.9	74.6	12.3
Norbornene	3.6	16.4	-12.8
Acetanilide	18.3	13.4	4.9
1,2,6,7,8,9-Hexahydro-1,6,6-trimethylphenanthro[1,2-b]furan-10,11-dione	26.5	19.1	7.4
2-Fluorobenzamide	21.8	15.8	6
Cyclohexadecane	53.3	37.8	15.5
Triphenylethylene	20.4	14.8	5.6
Camphor	2.5	15.7	-13.2
2-(1'-Hydroxycyclohexyl)cyclohexanone	20.8	28.5	-7.7
1,2,3,7,8-Pentachlorodibenzo-p-dioxin	45.4	45.7	-0.3
1-Hydroxycumene	17.3	12.6	4.7
2,4,5-Trimethoxybenzoic acid	31.2	35.8	-4.6
1,4-Diaminobutane	31.9	36.3	-4.4
4-Nitrobenzonitrile	19.2	13.9	5.3
Vitamin B3	25.5	18.3	7.2
1,4-D-Mannonolactone	36.1	25.7	10.4
Tetracene	18.8	13.6	5.2
3-Chlorothiophene	9.39	20.6	-11.21
4,4'-Thiodiphenol	31	22.1	8.9
Butyl 4-hydroxybenzoate	26.6	32.7	-6.1
Myristyl alcohol	45	45.6	-0.6
m-Anthranilic acid	33.7	23.9	9.8
6-Heptadecanol	49	48.4	0.6
4-Hydroxyphenylacetic acid	28	19.9	8.1
4,4'-Di-t-butylbiphenyl	19.8	14.1	5.7
2-Chloro-N,N-dimethylnicotinamide	21.39	15.2	6.19
2,4-Dinitrophenol	26.19	18.5	7.69
1,2,4,6,7,8-Hexachlorodibenzofuran	50.8	35.7	15.1
N-(2-Chlorophenyl)benzenesulfonamide	33.5	23.6	9.9
2,3,8-Trichlorodibenzofuran	41	28.8	12.2
2-Oxa-6-thiaadamantane	12.23	22.9	-10.67
3,3-Dimethyl-1-butanol	9.5	21	-11.5
1,2,3,4,7,8-Hexachlorodibenzofuran	50.9	35.7	15.2
Methyl heptacosanoate	95.6	81.2	14.4
1,2-Dimethylbenzimidazole	15	10.6	4.4
Tetradecyl urea	53.6	51.9	1.7
Tridecyl urea	50.3	49.6	0.7
1,2,3,4,6,8-Hexachlorodibenzofuran	51	35.7	15.3
1,2,3,6,7,8-Hexachlorodibenzofuran	51	35.7	15.3
2-(4-Nitrophenyl)-1-(4-(4-pentylcyclohexylethyl)phenyl)ethanone	37.95	41	-3.05
4-Amino-N-(4-nitrophenyl)benzenesulfonamide	18.9	27.7	-8.8
Torasemide	37.2	26	11.2
2,3,4,6,7,8-Hexachlorodibenzofuran	51.1	35.7	15.4
2-Thiopheneacetic acid	14	24.3	-10.3
N-Propionylpyrazinecarboxamide	23.5	16.4	7.1
1,2,3,4,7-Pentachlorodibenzo-p-dioxin	44.6	45.7	-1.1
1,4-Dimethoxybenzene	18.7	27.6	-8.9
Monomethyl terephthalate	37.7	26.3	11.4
1,1,2-Triphenylethane	24.4	17	7.4
2,7-Dibromofluorene	21	14.6	6.4
N,N,N',N'-Tetramethyloxamide	18	12.5	5.5
1,2,4,6,8,9-Hexachlorodibenzofuran	51.3	35.7	15.6
2-Butyl-2-ethyl-1,3-propanediol	20.8	29.2	-8.4
Pentyl urea	23.5	31.1	-7.6
N-(4-Methoxyphenyl)sulfanilamide	24.6	31.9	-7.3
Propyl Naltrexone-3-O-carbonate	21	14.4	6.6
t-Butyl propyl ether	9.9	21.7	-11.8
1,3-Dihydroxybenzene	21.3	14.6	6.7
1,2,7,8-Tetrachloronaphthalene	14.6	25	-10.4
Methyl naltrexone-3-O-carbonate	10.9	7.3	3.6
Pentachlorobenzene	19.4	28.4	-9
Fluoranthene	12.1	8.1	4
Palmitic acid	72.7	50.4	22.3
Decyl urea	39.6	42.6	-3
3-Nitrobenzonitrile	20.5	13.9	6.6
Guajen	23.97	16.3	7.67
Pimelamide	44.6	30.7	13.9
Enantholactam	11.7	23.2	-11.5
Hexachlorobenzene	22.4	30.7	-8.3
2-(Chloromethyl)benzonitrile	20.53	13.8	6.73
Monacolin K	43.14	45.2	-2.06
1,2,4-Trichlorodibenzo-p-dioxin	37.1	41	-3.9
Aspirin	29.2	35.5	-6.3
1,2,3,7,8-Pentachloronaphthalene	17.6	27.4	-9.8
Isobutyl t-butylether	8.7	21.2	-12.5
2-(Biphen-3-yl)naphthalene	18.5	12.3	6.2
Glutaramide	38.4	26.2	12.2
2-Bromo-7-iodofluorene	20.6	13.7	6.9
4-Chlorobenzoic acid	30.91	20.9	10.01
5,5-Dimethyltetrahydro-1,3-oxazin-2-one	28.5	19.2	9.3
Pentadecane	32.1	37.7	-5.6
Penconazole	33.58	22.7	10.88
1-(4-Nitrophenylethynyl)-4-propylbenzene	23.3	15.5	7.8
Basketene	2.7	1.1	1.6
6-Hydroxymethyl-5,6-dihydro-7H-dibenzo[a,c]cycloheptane	25.9	17.3	8.6
Fenpropathrin	18.6	28.3	-9.7
Methyl arachidate	72	65.7	6.3
1,3,5-Trithiane	32.3	38	-5.7
Heptyl urea	29	35.7	-6.7
N,N,N',N'-Tetrapropyloxamide	21	13.7	7.3
2,6-Xylenol	0.3	15.7	-15.4
Methyl pentacosanoate	87.7	76.8	10.9
Methyl docosanoate	78.2	70.2	8
Butylcyclohexane	14.2	25.5	-11.3
4-(Trifluoromethyl)-7-(N,N-dimethylamino)coumarin	26.3	17.3	9
Cholestanole	22.6	31.4	-8.8
Octachlorodibenzofuran	59.4	40.4	19
4-Methoxycinnamaldehyde	19	28.9	-9.9
N-(4-Methoxyphenyl)-4H-3,1-benzothiazin-2-amine	16.1	26.9	-10.8
Ethyl naltrexone-3-O-carbonate	19	12.1	6.9
Methyl 4-aminobenzoate	20.2	29.8	-9.6
3-Bromoacetophenone	5.7	19.7	-14
3-Bromocinnamic acid	31.1	20.5	10.6
2-Chloroaniline	12.4	24.4	-12
Alemcinal	36.7	24.4	12.3
n-Butylurea	17.8	28.2	-10.4
1-Methylbenzimidazole	12.4	7.4	5
Cyclodecane	19	29.1	-10.1
2-Cyano-4'-methylbiphenyl	18.79	11.8	6.99
m-Terphenyl	20.8	13.2	7.6
s-Triazine	15.4	9.4	6
Octadecanamide	57	55.7	1.3
Diphenylmethanol	22.7	14.5	8.2
2,6-Dimethylnaphthalene	25.3	16.3	9
Malonamide	31.74	20.8	10.94
Propanolamine	16.9	27.7	-10.8
Tolfenamic acid	41.2	27.4	13.8
4-Bromobenzoic acid	30.9	20.2	10.7
1,2,3,4,6,8,9-Heptachlorodibenzofuran	56.4	38	18.4
4-Trifluoromethyl-7-aminocoumarin	31.7	20.7	11
Carvedilol	57.6	38.8	18.8
Propylurea	14.3	26	-11.7
Tri-p-tolylamine	19.95	12.4	7.55
1,2,3,4,7,8,9-Heptachlorodibenzofuran	56.6	38	18.6
1,7-Heptanediamine	38.2	42.8	-4.6
p-Quaterphenyl	18.9	11.6	7.3
Ethyl vanillin	23.1	32.3	-9.2
2-Ethylhexyl-alpha-D-glucoside	37	24.2	12.8
Hexacosanoic acid	80.6	72.5	8.1
3,6-Dichlorodibenzofuran	40.2	26.4	13.8
Flufenamic acid	19.6	12	7.6
4-Methoxyisonitrosoacetanilide	8.3	4.1	4.2
1,2,3,4,6,7,8-Heptachlorodibenzofuran	56.8	38	18.8
4-t-Octylphenol	27.2	17.3	9.9
1,3,7,8-Tetrachlorodibenzo-p-dioxin	38.9	43.4	-4.5
N-Caproyl-pyrazinamide	35.95	23.4	12.55
Ethyl 8-(hydroxymethyl)-6-chloro-2-oxo-2H-1-benzopyran-3-carboxylate	38	42.8	-4.8
Methylurea	12.5	25	-12.5
4-Bromo-4'-(5-hexenyloxy)biphenyl	29.8	37.1	-7.3
Methyl hexadecanoate	58.1	56.9	1.2
Erythritol	29.1	18.5	10.6
Ethylcyclohexane	8.5	22.3	-13.8
3-Furancarboxylic acid	21.3	13	8.3
Pyracene	20.9	12.7	8.2
3,5-Di-t-butyl-o-quinone	26.5	16.6	9.9
Paracetamol	26.5	16.6	9.9
1-Chloro-4-fluorobenzene	29.1	18.4	10.7
Niclosamide	36	23.2	12.8
Metazachlor	19.7	11.8	7.9
Dimethyl malonate	54.2	35.9	18.3
1,2,3,7-Tetrachlorodibenzo-p-dioxin	38.5	43.4	-4.9
Homopiperonylic acid	24.9	33.9	-9
Sorbitol	30.35	19.2	11.15
1,9-Nonanediamine	44	47.3	-3.3
2-Hydroxybenzamide	29	18.2	10.8
Propylcyclohexane	10.6	24	-13.4
Hexadecanedioic acid	52.2	53.1	-0.9
Dimethyl isophthalate	22.3	32.2	-9.9
1-Aminoadamantane	1.8	17.9	-16.1
4-(Trifluoromethyl)-7-(N-ethylamino)coumarin	30.5	19.1	11.4
Flurbiprofen	28.1	17.4	10.7
2-Phenylsuccinic acid	37.4	23.9	13.5
Indometacin	32.9	20.7	12.2
5-Hydroxymethylene-5H-6,7-dihydrodibenzo[a.c]cyclohepten-6-one	16.9	9.5	7.4
6,7,8,9-Tetrahydro-6-(hydroxymethyl)-1,6-dimethylphenanthro[1,2-b]furan-10,11-dione	23.7	14.2	9.5
N,N’-Bis(salicylaldehydo)ethylenediimine	34.1	40.7	-6.6
4-(1-Methylheptyloxy)-4'-cyanobiphenyl	20.8	31.5	-10.7
Dimethyl 2,6-cuneanedicarboxylate	23.4	13.8	9.6
2-Methylnaphthalene	26	15.6	10.4
1,2,3,4,5,6,7-Heptafluoronaphthalene	17.3	9.5	7.8
Ethylurea	9.6	23.8	-14.2
1,3-Benzoxazine-2,4-dione	28.63	17.4	11.23
2-Fluorofluorene	19.5	11	8.5
Eicosane	69	45.6	23.4
Methyl 4-methoxybenzoate	18.4	30	-11.6
1,3-Benzodioxol-5-ol	16.96	29	-12.04
N-Decanoylpyrazinamide	50.58	32.7	17.88
4-Biphenylmethanol	27	16.2	10.8
Nonadecylcyclohexane	77.79	51.7	26.09
2,3-Dichlorodibenzo-p-dioxin	30.8	38.7	-7.9
9-Fluorenylmethanol	21	12	9
Tridecane	24.7	34.5	-9.8
1-Phenyl-1,3-butanedione	35.4	22	13.4
1-Heptanol	18.4	30.1	-11.7
Methyl heneicosanoate	72.6	68	4.6
N-(3-Methylphenyl)-N,N-bis(4-methylphenyl)amine	21.71	12.4	9.31
3-Amino-2-methylbenzoic acid	38.5	24.1	14.4
3-Acetoxyacetophenone	22.1	32.8	-10.7
2,7-Difluorofluorene	18.8	10.2	8.6
Biphenylene	17.4	9.2	8.2
4-Trifluoromethyl-7-(diethylamino)coumarin	23.3	13.3	10
2-(4-Nitrophenyl)-1-(4-butoxyphenyl)ethanone	24.9	34.9	-10
1-Propanol	5.4	21.3	-15.9
Azelamide	55	35.3	19.7
1H,1H-Perfluorododecan-1-ol	20.1	31.7	-11.6
1,5-Diaminopentane	29.8	38.5	-8.7
N,N-Dimethylbenzamide	22.3	12.4	9.9
Phenoxathiin	19.4	31.3	-11.9
Dimethyl oxalate	22.8	33.7	-10.9
Quinoxaline	7.9	23.3	-15.4
Naltrexone	15.6	7.6	8
Hexyl urea	22.4	33.5	-11.1
4-Hydroxy-2-pyrrolidone	23.4	13	10.4
2,7-Diiodofluorene	23.1	12.7	10.4
2-Carboxyadamantane	4.5	21.1	-16.6
9-Hydroxyfluorene	17.4	8.7	8.7
Ethyl 8-(hydroxymethyl)-6-methyl-2-oxo-2H-1-benzopyran-3-carboxylate	32.5	40.7	-8.2
1,2,3-Benzenetriol	25.9	14.6	11.3
Sulfathiazole	30.3	39.2	-8.9
Piperonyl alcohol	18.1	30.7	-12.6
Barbituric acid	22.17	11.9	10.27
1,3-Diaminopropane	22.7	34	-11.3
4-Carboxyphenol	30.85	17.9	12.95
Undecyl urea	38.4	45	-6.6
1,11-Undecanediamine	48.1	51.8	-3.7
Salol	19.2	31.6	-12.4
9-Heptadecanol	43.2	48.4	-5.2
1,6-Dimethylphenanthro[1,2-b]furan-10,11-dione	22.1	11.7	10.4
Methyl octadecanoate	61.6	61.3	0.3
2-(4-Nitrophenyl)-1-(4-pentyloxyphenyl)ethanone	27.1	37.2	-10.1
4-Acetoxyacetophenone	20.7	32.8	-12.1
Tranilast	48.9	30.3	18.6
1,2,4-Trichlorobenzene	7.6	23.7	-16.1
2-Adamantanone	2.3	20	-17.7
Snoutene	7.87	1.6	6.27
1-Pentanol	10.5	25.8	-15.3
3-Aminophenylacetic acid	42.7	25.8	16.9
2-Thiaadamantane	10.1	25.6	-15.5
Methyl 3-aminobenzoate	16.1	29.8	-13.7
Cyclohexanone oxime	12.7	4.8	7.9
Di-t-butyl oxalate	21.3	33.5	-12.2
Camphene	2.3	20.3	-18
19-Oxaheptatriacontane	116.7	100.3	16.4
Methyl nonadecanoate	63.8	63.5	0.3
2,3,7-Trichlorodibenzo-p-dioxin	31.6	41	-9.4
17-Methyltestosterone	27.8	15	12.8
3-Octyloxybenzoic acid	33.12	42.1	-8.98
Estrone propionate	23	35.1	-12.1
3,4-Dimethoxybenzaldehyde	20.3	33.3	-13
Stearic acid	50.9	54.7	-3.8
Dibenzo-p-dioxin	21.2	34	-12.8
Imidazole	14.1	29.1	-15
1-Nonadecanoic acid	54	57	-3
Isoniazid	27.9	38.8	-10.9
Dicyclohexylsulfide	15.7	30.3	-14.6
Chrysin	39.2	22.4	16.8
Undecanediamide	64.4	40	24.4
Cyclohexylacetic acid	13.8	29.2	-15.4
1,3-Dithiane sulfone	22	10.3	11.7
2-(4-Biphenylyl)naphthalene	25.1	12.3	12.8
7-Norbornanone	0.6	20.2	-19.6
Tulobuterol	25.4	12.4	13
Ethyl 8-(hydroxymethyl)-6-methoxy-2-oxo-2H-1-benzopyran-3-carboxylate	36.4	45.4	-9
1,2,4-Trihydroxybenzene	28.8	14.6	14.2
B-Carotene	56	33.6	22.4
Ethyl 4-aminobenzoate	21.1	34.8	-13.7
2-Chloro-3-(trifluoromethyl)pyridine	18.86	7.6	11.26
Myclobutanil	30.9	16	14.9
4,4'-Bipyridine	35.2	19	16.2
Methyl adamantyl-1-carboxylate	7.7	25.5	-17.8
Fenbufen	41.1	23.1	18
4-Methyl-4-cyclohexene-1,2-dicarboxylic anhydride	17.7	32.5	-14.8
1,3,7-Trichlorodibenzo-p-dioxin	29.8	41	-11.2
trans-9,10-Bishydroxymethyl-9,10-dihydrophenanthrene	30.3	15.5	14.8
cis-Verbenol	26.3	12.7	13.6
N,N'-Bis(salicylaldehydo)tetramethylenediimine	35.5	45	-9.5
4-Butylphenyl-(6-(4-butylphenyl)aminomethylene-9-methyl-9H-carbazol-3-ylmethylene)-amine	29.6	40.9	-11.3
2,3-Dimethyl-2,3-dinitrobutane	37.8	20.7	17.1
Acridone	32.5	16.9	15.6
Cyclohexanecarboxylic acid	9.2	26.8	-17.6
Propyl 2-cyano-6-methoxy-1(2H)-quinolinecarboxylate	15.6	5	10.6
2,3-Pyrazinedicarbonitrile	19.8	7.9	11.9
(11Z)-Eicosenoic acid	49.4	55	-5.6
N,N-Bis(3-methylphenyl)-N-(4-methylphenyl)amine	26.39	12.4	13.99
1-Pentadecanoic acid	39.4	48.1	-8.7
Pentacosane	47.2	53.6	-6.4
Isatin	27.8	13.3	14.5
Docosanamide	63.3	64.9	-1.6
Dimethyl cubane-1,4-dicarboxylate	28.7	13.8	14.9
Naringenin	39.8	21.4	18.4
1,3,6,8-Tetrachlorodibenzo-p-dioxin	32.1	43.4	-11.3
2,8-Dichlorodibenzo-p-dioxin	25	38.7	-13.7
Carbamazepine	24.9	10.6	14.3
Benzo[b]fluorene	24.5	10.3	14.2
8-Oxabicyclo[5.1.0]octane	2.2	22.9	-20.7
p-Acetotoluide	28.9	13.3	15.6
Oxolinic acid	43.6	23.5	20.1
3-Hexyloxybenzoic acid	22.7	37.4	-14.7
n-Butylcarbamate	16.3	33.1	-16.8
Tetradecanediamide	77.5	46.9	30.6
1,1,2,2-Tetra-t-butylethane	23.5	9.1	14.4
N,N,N',N'-Tetraethyloxamide	17	4.5	12.5
6,7,8,9-Tetrahydro-1,6,6-trimethylphenanthro[1,2-b]furan-10,11-dione	29.2	13	16.2
trans-5-Hydroxymethyl-5,6-dihydro-7H-dibenzo[a,c]cycloheptan-6-ol	31.8	14.8	17
Butyl 4-aminobenzoate	23.9	38.7	-14.8
3-(Butanoyloxy)-estra-1,3,5(10)-trien-17-one	22	37.4	-15.4
3,3'-Di-naltrexonyl-carbonate	17.5	4.7	12.8
9-Acetylcarbazole	15.1	3	12.1
3-Carboxyphenol	36.5	17.9	18.6
Cyclododecane	13.4	31.5	-18.1
Erucic acid	53.1	59.3	-6.2
3-(Pentoyloxy)-estra-1,3,5(10)-trien-17-one	25	39.7	-14.7
Diphenylacetamide	23.4	8.6	14.8
Prednisolone acetate	42.3	21.8	20.5
1,2,4,7,8-Pentachlorodibenzo-p-dioxin	33.5	45.7	-12.2
Ketorolac	28.62	12.2	16.42
Estrone acetate	15	32.8	-17.8
9-Ethyl-9H-carbazole	13.2	1.4	11.8
Isopropyl Naltrexone-3-O-carbonate	26.6	10.7	15.9
Ethyl 8-(hydroxymethyl)-6-bromo-2-oxo-2H-1-benzopyran-3-carboxylate	28.2	42.1	-13.9
2-Chlorodibenzo-p-dioxin	19.9	36.3	-16.4
Diflunisal	35.8	17.1	18.7
19-Octatriacontene	108.37	98.2	10.17
Heneicosane	35.2	47.2	-12
4-Aminosalicylic acid	47.9	25.2	22.7
N-Methylcarbazole	16	2.8	13.2
3-Decyloxybenzoic acid	33.9	46.7	-12.8
trans-Azobenzene	21.3	37.9	-16.6
Cycloheptanol	2.7	24.9	-22.2
1-Chlorodibenzo-p-dioxin	19	36.3	-17.3
(15Z)-Tetracosenoic acid	58.3	63.8	-5.5
Valium	25.49	9.2	16.29
1,4-Oxathiane 4,4-dioxide	20.2	5.5	14.7
4-Octylbenzoic acid	14.6	33.4	-18.8
Hexacosane	45.5	55.1	-9.6
6-Dodecyloxyisoquinoline	38.9	50.5	-11.6
o-Anisic acid	5.7	27.3	-21.6
Dibenzo-30-crown-10	86.5	83.8	2.7
4-Hexylbenzoic acid	7.9	29	-21.1
Saccharin	29.9	11.8	18.1
Pindolol	58	31.3	26.7
Cilostazol	44.7	22	22.7
5-(1,1-Dimethylheptyl)-2-(5-hydroxy-2-(3-hydroxypropyl)-cyclohexyl)phenol	18.4	36.8	-18.4
Ethyl eicosanoate	68.6	71.9	-3.3
Tetracosane	40.1	52	-11.9
Cholesteryl 2-methylpropionate	25.2	41.6	-16.4
1,3,5-Trihydroxybenzene	34.5	14.6	19.9
Hexacyclopropylethane	23.2	6.7	16.5
Adipamide	54.3	28.4	25.9
4-Chlorophenyl 2-cyano-6-methoxy-1(2H)-quinolinecarboxylate	22.4	6.1	16.3
Methyl 2,4-dichlorophenoxyacetate	20	38.4	-18.4
2,5-Bis(biphenyl-4-yl)thiophene	39	17.2	21.8
Sebacamide	68.7	37.7	31
cis-Cyclohexane-1,2-dicarboxylic anhydride	14.71	35.4	-20.69
2-Ethoxyisonitrosoacetanilide	27.8	8.8	19
Cyclooctanol	4.02	28	-23.98
1,2,3,4-Tetrachlorodibenzo-p-dioxin	25.7	43.4	-17.7
4-Heptadecanol	35.7	50.4	-14.7
Quercetin	41.5	18	23.5
Methyl heptadecanoate	48.1	59.2	-11.1
3-(Octyloxy)-estra-1,3,5(10)-trien-17-ol	21	40.3	-19.3
Ethyl 8-(hydroxymethyl)-6-chloro-5,7-dimethyl-2-oxo-2H-1-benzopyran-3-carboxylate	28.7	45.7	-17
(9Z)-hexadecenoic acid	29.1	46	-16.9
Ethyl undecanoate	36.2	51.1	-14.9
Cyclododecanone	17.7	38.2	-20.5
3-(Hexoyloxy)-estra-1,3,5(10)-trien-17-one	23	42	-19
1,3,5-Trimethyladamantane	26.1	6.6	19.5
Fenoxycarb	26.98	45	-18.02
Suberamide	63.9	33	30.9
Hydrocortisone acetate	53.64	25.8	27.84
[2.2]Paracyclophane-1,9-diene	30.7	9.7	21
1-Heptadecanol	37	52.2	-15.2
3,4,5,6-Tetrahydrophthalic anhydride	11.9	34.7	-22.8
2-Bromoethyl 2-cyano-6-nitro-1(2H)-quinolinecarboxylate	19.8	1.9	17.9
Prazepam	27.7	7.3	20.4
Phenyl 2-cyano-6-methoxy-1(2H)-quinolinecarboxylate	22.9	3.7	19.2
2,5-Dimethyl-3-hexyne-2,5-diol	23.9	4.3	19.6
3'-(Nitrooxymethyl)phenyl 2-acetoxybenzoate	33.8	50.7	-16.9
Tristearin	195.8	164	31.8
1-Pentadecanol	29.6	47.9	-18.3
2-Methylpropyl 2-cyano-6-methoxy-1(2H)-quinolinecarboxylate	24.5	4.4	20.1
Dodecanediamide	78.8	42.3	36.5
1,1'-(1,12-Dodecanediyl)bisthymine	43.95	17.9	26.05
Ethyl tridecanoate	40.7	55.8	-15.1
2-Pyridinealdoxime	19.98	1.1	18.88
2,10-Dimethylacridin-9(10H)-one	22.4	2.6	19.8
Ethyl 2-cyano-6-methoxy-1(2H)-quinolinecarboxylate	22.4	2.6	19.8
Simvastatin	29.6	48.3	-18.7
Methyl 4-(2,4-dichlorophenoxy)butyrate	22	43.1	-21.1
Butyl 2-cyano-1(2H)-quinolinecarboxylate	22.5	2.3	20.2
Azacyclotridecan-2-one	9	34.3	-25.3
3-(p-Terphenyl-4-yl)-5-phenylthiophene	43	16.4	26.6
Dibenzo-24-crown-8-ether	62.5	71.9	-9.4
Isobutyl p-aminobenzoate	10.7	35.7	-25
3-(p-Terphenyl-4-yl)-4-phenylthiophene	42	15.6	26.4
7-Heptadecanol	28.8	48.4	-19.6
Benzimidazole	47.8	19.6	28.2
Salicaine	26.8	47.1	-20.3
Arachic alcohol	43.6	58.9	-15.3
Butyl 2-cyano-6-nitro-1(2H)-quinolinecarboxylate	25.2	3.6	21.6
3-(Octyloxy)-estra-1,3,5(10)-trien-17-one	19	41.8	-22.8
2,6-Di-t-butylphenol	42	15	27
Ethyl beta-cyano-3,4-dimethoxy-alph,alpha-dimethyl-beta-(1-methylethyl)benzenepropanoate	8.8	35.1	-26.3
Isoquercitrin	49.8	20.3	29.5
Benzo-12-crown-4	21.6	44.3	-22.7
Arcoxia	30.4	6.5	23.9
N-Methyl-(1-(1-(2-fluorophenethyl)piperidin-4-yl)-1H-indol-6-yl)acetamide	35.2	9.8	25.4
17-Tetratriacontene	84.93	88.8	-3.87
3-(Heptoyloxy)-estra-1,3,5(10)-trien-17-one	21	44.4	-23.4
2-Methoxyisonitrosoacetanilide	27.8	4.1	23.7
3-(Undecanoyloxy)-estra-1,3,5(10)-trien-17-one	34	53.6	-19.6
3-(Octoyloxy)-estra-1,3,5(10)-trien-17-one	24	46.7	-22.7
Fentanyl	30.1	5.6	24.5
Benzo-15-crown-5	29.2	50.6	-21.4
1,4-Dithiane sulfone	26.9	3	23.9
2-Propenyl 2-cyano-6-nitro-1(2H)-quinolinecarboxylate	26.9	2.7	24.2
Propyl 2-cyano-6-nitro-1(2H)-quinolinecarboxylate	25	1.3	23.7
1,1'-(1,10-Decanediyl)bisthymine	42.6	13.4	29.2
3-(Decanoyloxy)-estra-1,3,5(10)-trien-17-one	29	51.3	-22.3
Hexa-2,4-diyne-1,6-diyl-bis(4-hexyloxybenzoate)	49.3	65.5	-16.2
Salicin	55.5	22	33.5
4-Butoxyphenyl-(6-(4-butoxyphenyl)aminomethylene-9-methyl-9H-carbazol-3-ylmethylene)-amine	34.4	55.4	-21
1,4,5,8-Tetrakis(propoxy)-anthracene	43.93	62.9	-18.97
3-(Nonanoyloxy)-estra-1,3,5(10)-trien-17-one	24	49	-25
Felodipine	31.5	54.7	-23.2
10-Methylacridin-9(10H)-one	29.7	2.4	27.3
10-Ethylacridin-9(10H)-one	27.5	0.3	27.2
4-Chloro-2'-hydroxy-4'-propoxyazobenzene	29.8	54.4	-24.6
2,4-Dinitrophenylhydrazine	18.89	46.8	-27.91
2-Methylpropyl 2-cyano-6-nitro-1(2H)-quinolinecarboxylate	28.3	0.6	27.7
2-Chloroisonitrosoacetanilide	29.7	1.4	28.3
17beta-4-Heptyloxybenzoyloxy testosterone	22	49.3	-27.3
3-(Dodecanoyloxy)-estra-1,3,5(10)-trien-17-one	31	55.9	-24.9
Dibenzo-18-crown-6	41.8	63.6	-21.8
10-Phenylacridin-9(10H)-one	38.9	7.3	31.6
Maltitol	55.1	18.3	36.8
Glimepiride	53.3	17	36.3
4,7-Dichloro-2-(4-n-tridecafluorohexylphenyl)isoindole-1,3-dione	38.3	6.5	31.8
4,5,6,7-Tetrachloro-2-(4-n-tridecafluorohexylphenyl)isoindole-1,3-dione	45.1	11.1	34
4-Octylphenyl-(6-(4-Octylphenyl)aminomethylene-9-methyl-9H-carbazol-3-ylmethylene)-amine	33.1	59.5	-26.4
5,6-Dichloro-2-(4-n-tridecafluorohexylphenyl)isoindole-1,3-dione	40.7	6.5	34.2
10-Methyl-2-nitroacridin-9(10H)-one	37.6	3.6	34
Butyl 6-(acetylamino)-2-cyano-1(2H)-quinolinecarboxylate	36.4	2.6	33.8
1,4,5,8-Tetrakis(propoxy)-9,10-anthraquinone	28.6	61	-32.4
Trielaidin	157.1	151.8	5.3
